# Supplementary material
Source: PubMed Central journal article supplement (PMC9481992)
Supplement: mmc1.pdf [file mmc1.pdf]

YMTHE, Volume 30

## **Supplemental Information**

### **Eliciting anti-cancer immunity by genetically engineered multifunctional exosomes**

**Qinqin Cheng, Zhefu Dai, Goar Smbatyan, Alan L. Epstein, Heinz-Josef Lenz, and Yong  
Zhang**

**Table S1.** List of primer sequences used for molecular cloning. Restriction enzyme sites EcoRI and NotI are underlined and italicized.

| DNA fragment for cloning | Primer sequence                                                                     |
|--------------------------|-------------------------------------------------------------------------------------|
| PD-1                     | Forward:<br>5'-CAGTGTGCTG <u><i>GAA TTC</i></u> GGCTTGGGGATATCCACC-3'               |
|                          | Reverse: 5'-<br>CCGGACTACCACCGCCTCCGCTAGCGAGGGGCCAAGAGCAGT<br>GTCCATCC-3'           |
| CD9-OX40L                | Forward: 5'-<br>CCCTCGCTAGCGGAGGCGGTGGTAGTCCGGTCAAAGGAGGCA<br>CCAAGTGCATCAAATACC-3' |
|                          | Reverse: 5'-<br>GATCTCGAG <u><i>CGGCCGC</i></u> CCTTAATGGTGGTGGTGGTGGTGAAGG-<br>3'  |
| PD-1-CD9-<br>OX40L       | Forward: 5'-CAGTGTGCTG <u><i>GAA TTC</i></u> GGCTTGGGGATATCCACC-3'                  |
|                          | Reverse:5'-<br>GATCTCGAG <u><i>CGGCCGC</i></u> CCTTAATGGTGGTGGTGGTGGTGAAGG-<br>3'   |

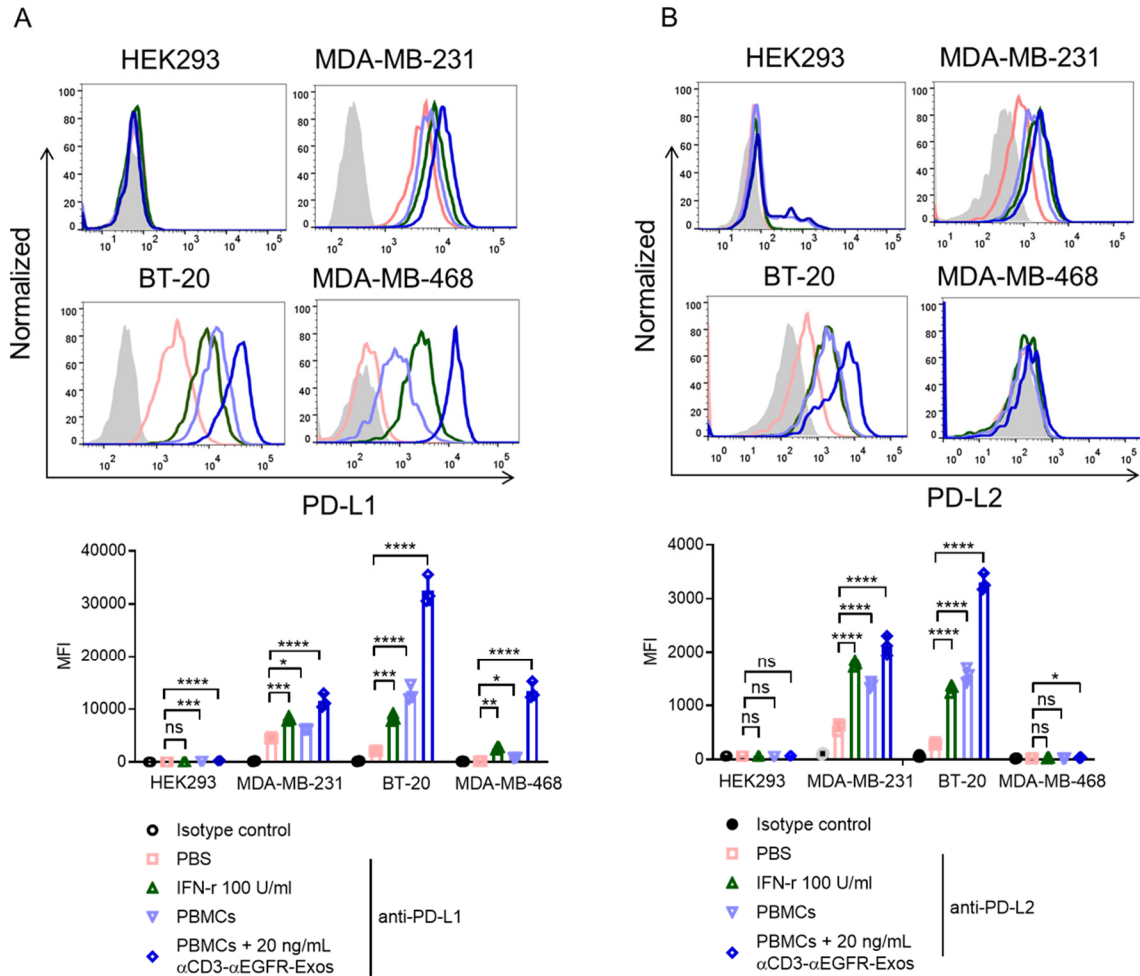

Figure S1. Flow cytometric analysis of expression levels of PD-L1 and PD-L2 at varied conditions. (A) and (B) Surface expression levels of PD-L1 (A) and PD-L2 (B) for HEK293 and three TNBC cell lines without and with stimulations. HEK293, MDA-MB-231, BT-20, and MDA-MB-468 cells were treated with 100 U/mL IFN- $\gamma$  or human PBMCs (PBMC:TNBC/HEK293=2:1) in the absence or presence of 20 ng/mL  $\alpha$ CD3- $\alpha$ EGFR-Exos for 48 hours at 37°C. Non-treated and treated cells were then analyzed for PD-L1 and PD-L2 expression by flow cytometry. Lower panels: quantitative representations of mean fluorescence intensities (MFIs) of PD-L1 (A) or PD-L2 (B) for each cell line. Data are shown as mean  $\pm$  SD of triplicates. ns = not significant, \*  $P < 0.05$ , \*\*  $P < 0.01$ , \*\*\*  $P < 0.001$ , and \*\*\*\*  $P < 0.0001$  (ordinary one-way ANOVA test).

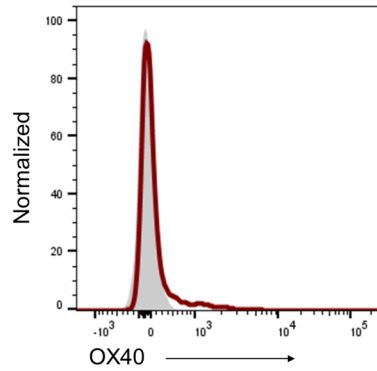

Figure S2. Flow cytometric analysis of OX40 expression on non-activated T cells.

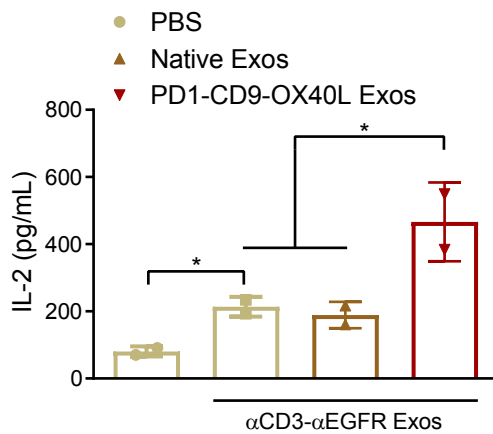

Figure S3. Enhancing T-cell activation by PD-1-OX40L-Exos. Human PBMCs were mixed with BT-20 cells at a ratio of 2:1 and incubated without or with  $\alpha$ CD3- $\alpha$ EGFR-Exos ( $20 \text{ ng mL}^{-1}$ ) in the absence or presence of  $10 \text{ }\mu\text{g mL}^{-1}$  PD-1-OX40L-Exos or native exosomes for 48 hours. The levels of secreted IL-2 were measured by ELISA. Data are shown as mean  $\pm$  SD of duplicates. \*  $P < 0.05$  (two-tailed unpaired  $t$  test).

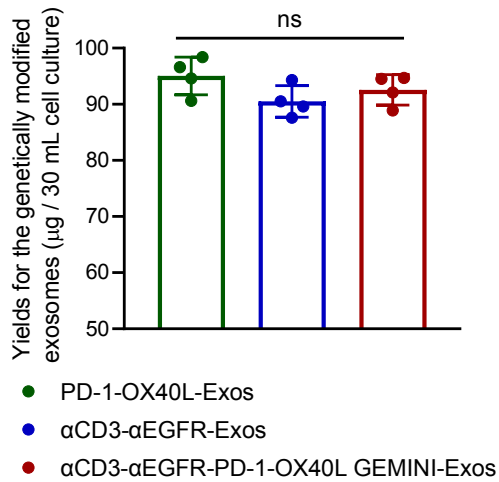

Figure S4. Yields of the genetically modified exosomes. Data are shown as mean  $\pm$  SD (n=4). ns = not significant,  $P > 0.05$  (ordinary one-way ANOVA test).

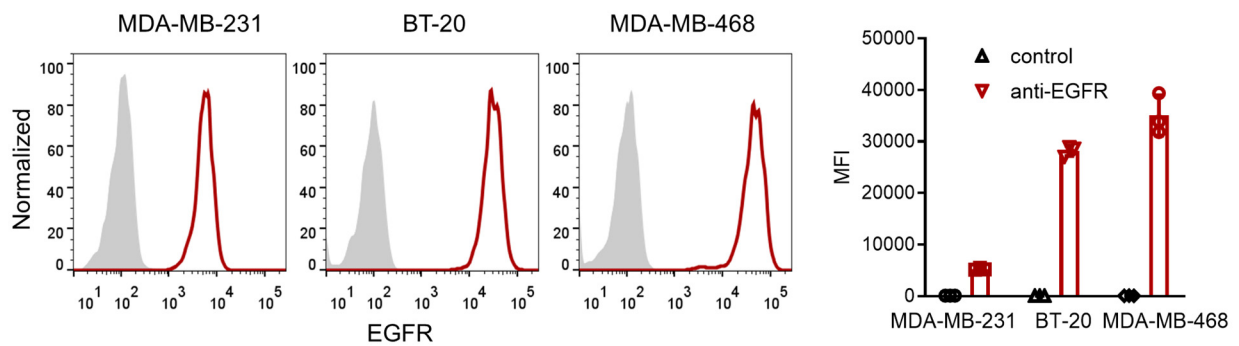

Figure S5. Flow cytometric analysis of EGFR expression for three TNBC cell lines. Right panel: quantitative representations of MFIs of EGFR for each cell line. Data are shown as mean  $\pm$  SD of triplicates.

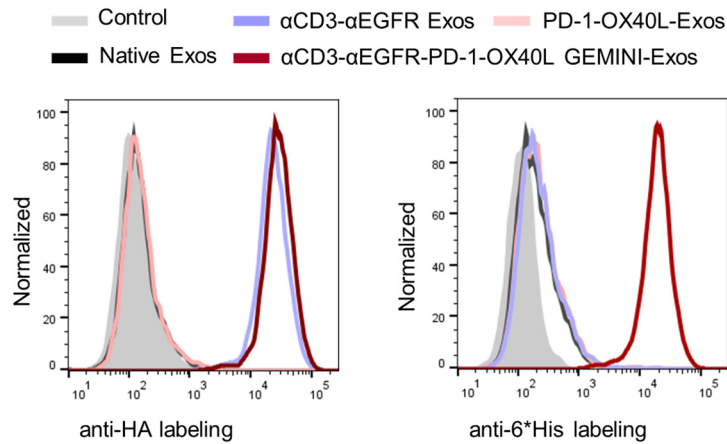

Figure S6. Flow cytometry of the binding of  $\alpha$ CD3- $\alpha$ EGFR-PD-1-OX40L GEMINI-Exos to MDA-MB-468 cells (PD-L1<sup>-</sup> PD-L2<sup>-</sup> OX40<sup>-</sup> CD3<sup>-</sup> EGFR<sup>+</sup>) as detected by the anti-HA or anti-6 $\times$ His antibody.

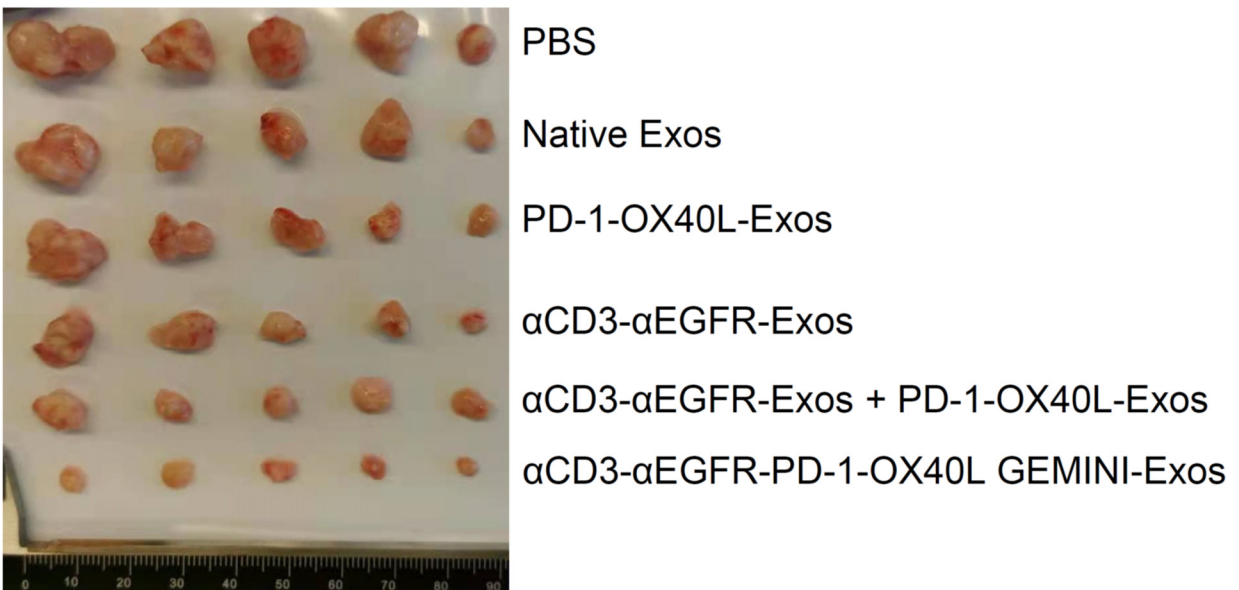

Figure S7. Photographs of xenografted mouse tumors at the endpoint.

Gating strategies for cell surface marker staining

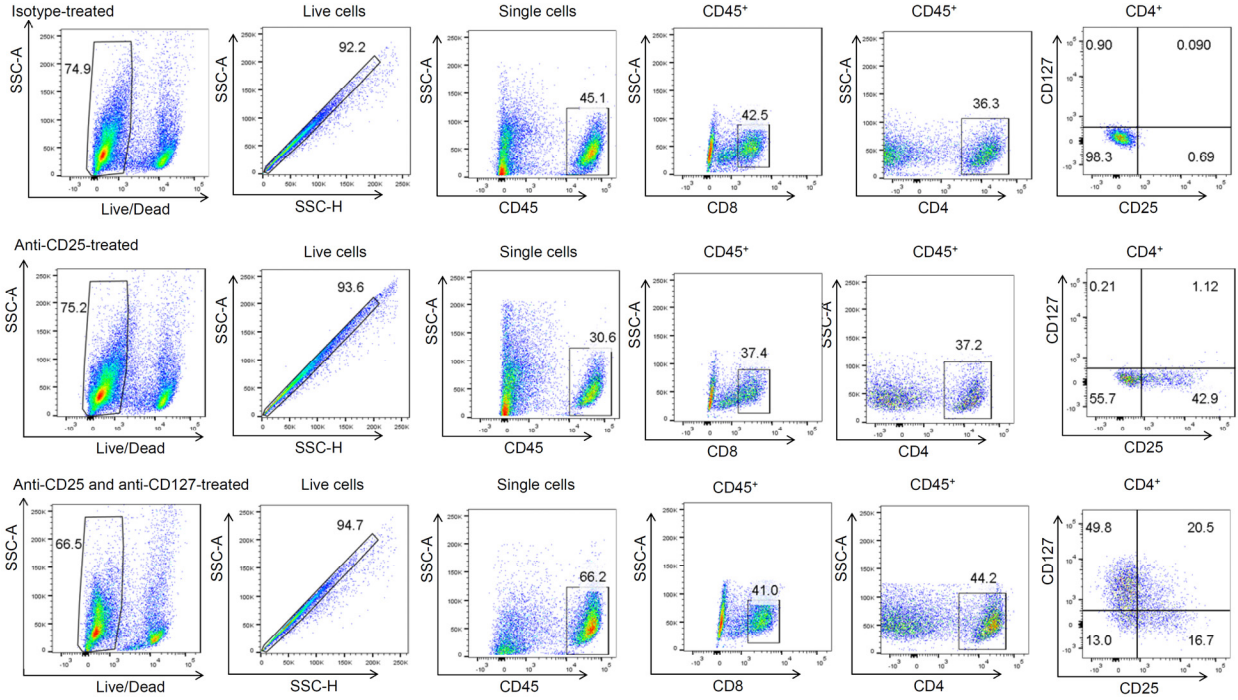

Figure S8. Gating strategy for CD4<sup>+</sup> CD25<sup>+</sup> CD127<sup>-</sup> Tregs.

Gating strategies for intracellular marker staining

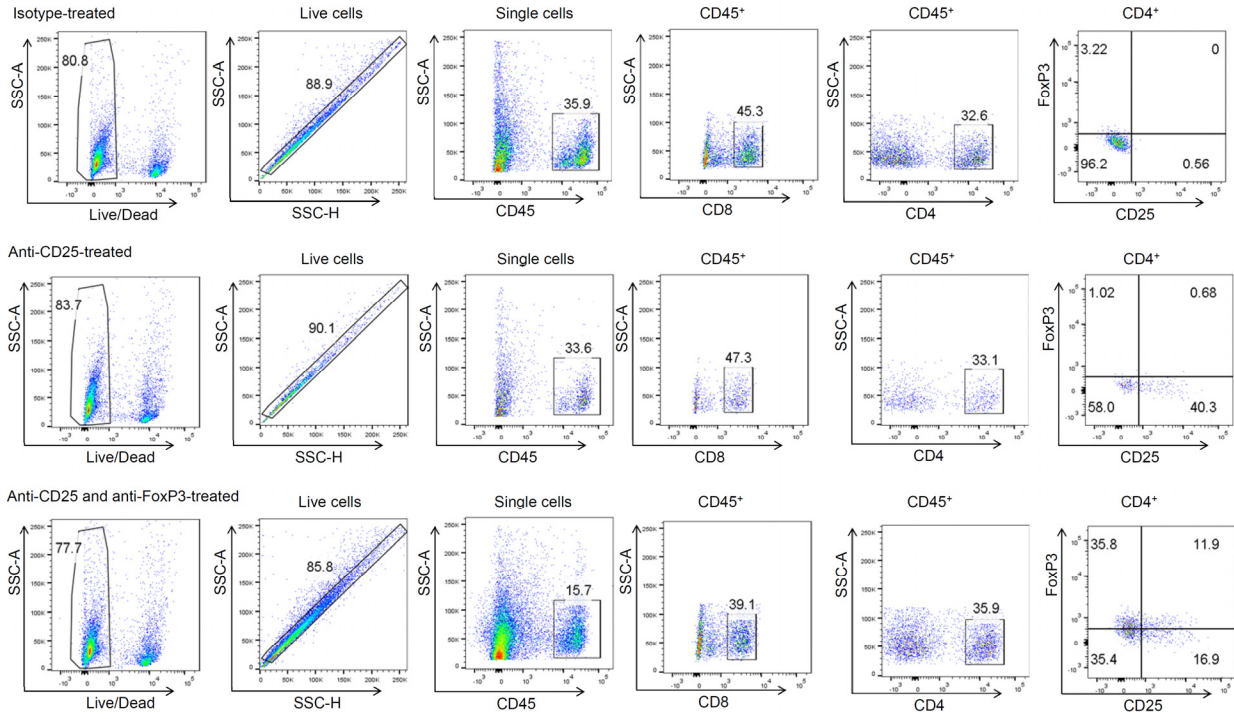

Figure S9. Gating strategy for CD4<sup>+</sup> CD25<sup>+</sup> FoxP3<sup>+</sup> Tregs.



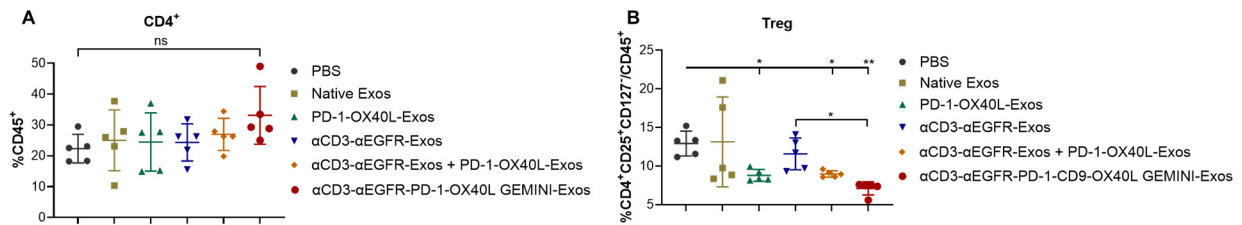

Figure S10. Immune phenotyping of tumor infiltrating lymphocytes. (A) Percentages of CD4<sup>+</sup> T cells in CD45<sup>+</sup> cells in tumors. (B) Percentages of CD4<sup>+</sup> CD25<sup>+</sup> CD127<sup>-</sup> Tregs in CD45<sup>+</sup> cells in tumors. At the end of the *in vivo* efficacy study, tumors were harvested and disaggregated into single-cell suspensions. After immunostainings, cells were analyzed by flow cytometry for the expression of CD45, CD4, CD8, CD25, and CD127. Data are shown as mean ± SD (n=5). ns = not significant, \* P < 0.05, and \*\* P < 0.01 (ordinary one-way ANOVA test).

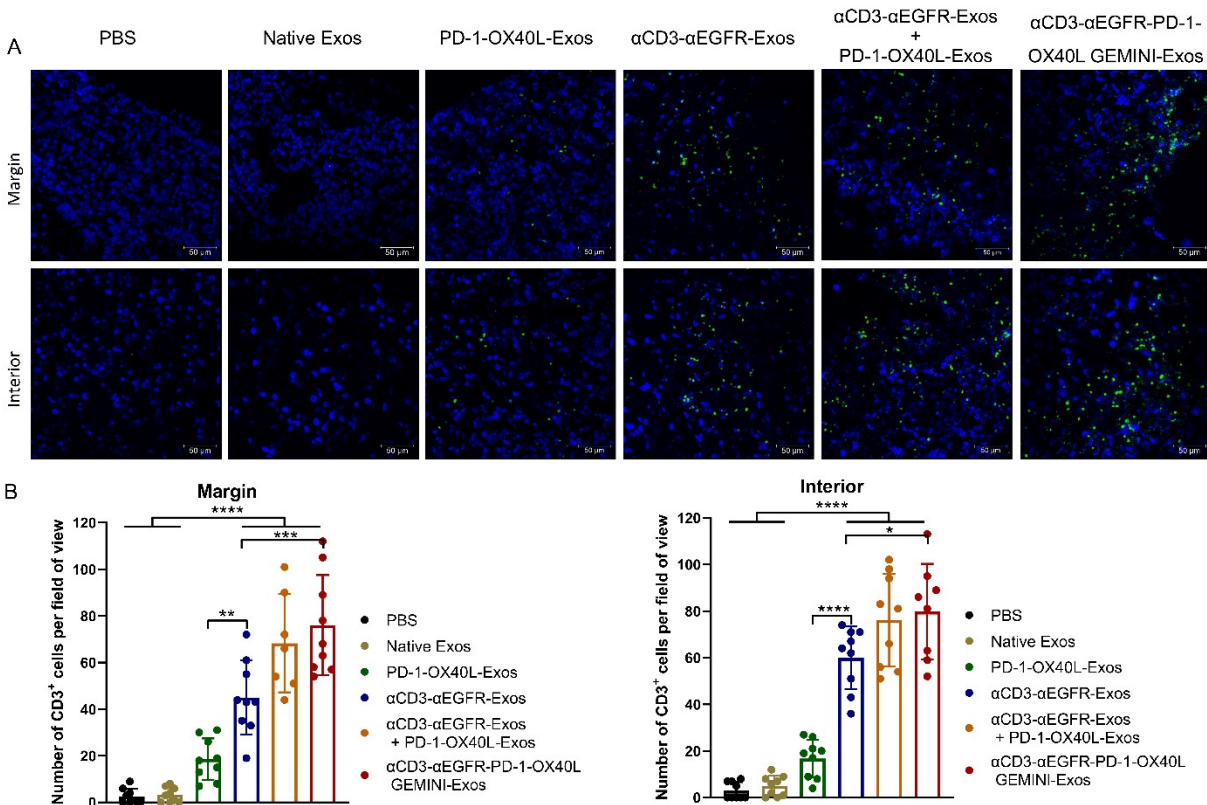

Figure S11. Immunohistofluorescence analysis of tumor-infiltrating T lymphocytes. (A) Representative immunohistofluorescence images of the margin and interior of frozen tumor sections from PBS- and exosomes-treated mice. Green: CD3<sup>+</sup> cells stained with the anti-CD3 antibody. Blue: nuclei stained with DAPI. Scale bars: 50  $\mu$ m. (B) Quantitative representation of the number of CD3<sup>+</sup> cells from each field of view along the margin and interior of each tumor from PBS- and exosomes-treated groups (up to three fields of view per region and three mice per group). Data are shown as mean  $\pm$  SD. \*  $P < 0.05$ , \*\*  $P < 0.01$ , \*\*\*  $P < 0.001$ , and \*\*\*\*  $p < 0.0001$  (ordinary one-way ANOVA test).

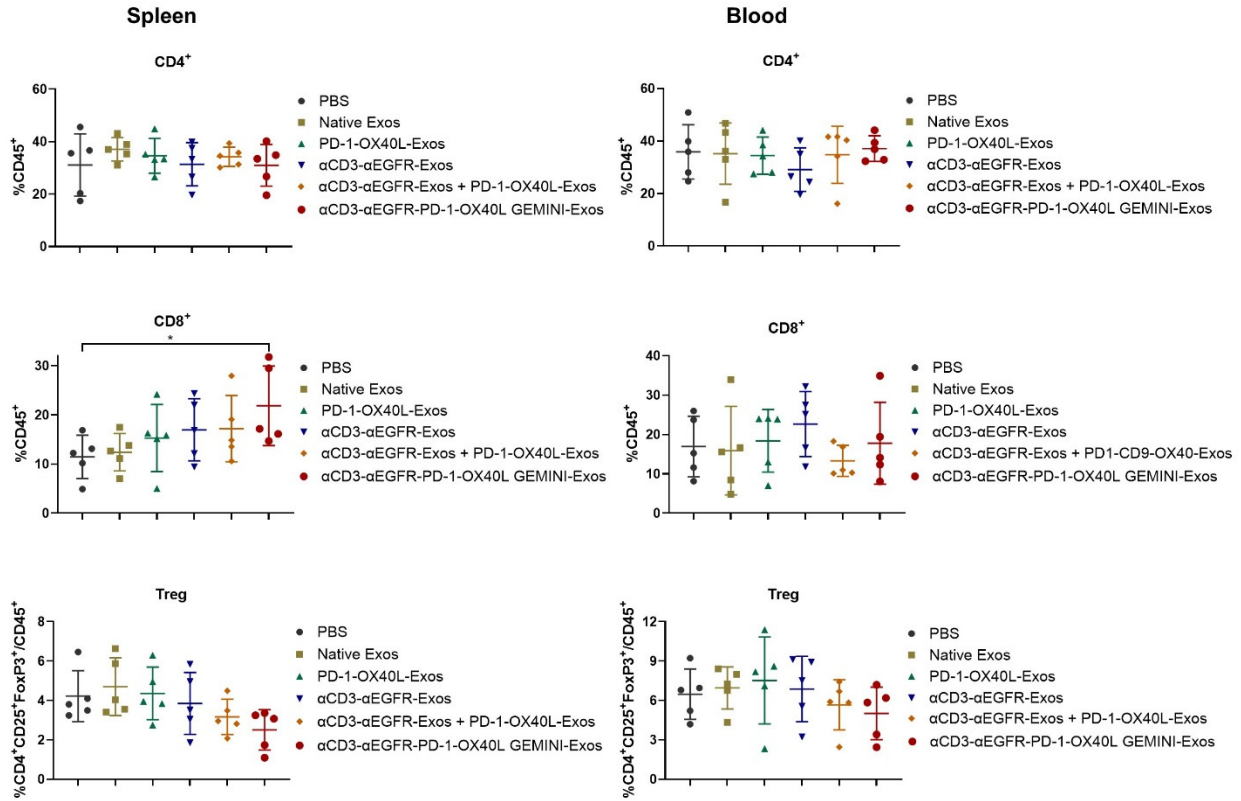

Figure S12. Immune phenotyping of lymphocytes in spleen and blood. At the end of the *in vivo* efficacy study, blood and spleen were harvested and spleen samples were disaggregated into single-cell suspensions. After immunostainings, cells were analyzed by flow cytometry for the expression of CD45, CD4, CD8, CD25, and FoxP3. Percentages of CD4<sup>+</sup> T cells (top), CD8<sup>+</sup> T cells (middle), and CD4<sup>+</sup> CD25<sup>+</sup> FoxP3<sup>+</sup> Tregs (bottom) in CD45<sup>+</sup> cells in spleen (left) and blood (right) were determined. Data are shown as mean  $\pm$  SD (n=5). \* P < 0.05 (ordinary one-way ANOVA test).
